# Supplementary material for: Pkd2l1 is required for mechanoception in cerebrospinal fluid-contacting neurons and maintenance of spine curvature
Source: PubMed Central journal article supplement (PMC6143598; doi:10.1038/s41467-018-06225-x), 2018-09-18
Supplement: 41467_2018_6225_MOESM3_ESM.pdf [file 41467_2018_6225_MOESM3_ESM.pdf]

## Description of Additional Supplementary Files

File Name: **Supplementary Movie 1**

Description: **Cilia in a 24 hpf *Tg( $\beta$ -actin:Arl13-GFP)* embryo.** Images were acquired at 33 Hz and are played in real time.

File Name: **Supplementary Movie 2**

Description: **Imaging of exogenous beads in the central canal of the spinal cord in a wild type embryo.** Images were acquired at 10 Hz and are played in real time.

File Name: **Supplementary Movie 3**

Description: **Imaging of endogenous particles with FF-OCT in the central canal of the spinal cord in a 26-28 hpf *Tg( $\beta$ -actin:Arl13-GFP)* embryo.** Images were acquired at 100 Hz and are played in real time.

File Name: **Supplementary Movie 4**

Description: **Calcium imaging of CSF-cNs in a wild type *Tg(pkd2l1:GCaMP5G)* embryo at 24-26 hpf.** Images were acquired at 4 Hz and are sped up 5x in the movie.

File Name: **Supplementary Movie 5**

Description: **Calcium imaging in CSF-cNs in a *cfap298<sup>m304/tm304</sup>* *Tg(pkd2l1:GCaMP5G)* embryos at 24-26 hpf.** Images were acquired at 4 Hz and are sped up 5x in the movie.

File Name: **Supplementary Movie 6**

Description: **Calcium imaging of CSF-cNs in a *pkd121<sup>-/-</sup>* *Tg(pkd2l1:GCaMP5G)* embryo at 24-26 hpf.** Images were acquired at 4 Hz and are sped up 5x in the movie.
